# Supplementary material for: Elemental Sulfur Formation by Sulfuricurvum kujiense Is Mediated by Extracellular Organic Compounds
Source: PubMed Central journal article supplement (PMC6890823; doi:10.3389/fmicb.2019.02710), 2019-11-27
Supplement: Presentation_1.pdf [file Presentation_1.pdf]

## Supplementary Material

### 1 Supplementary Figures

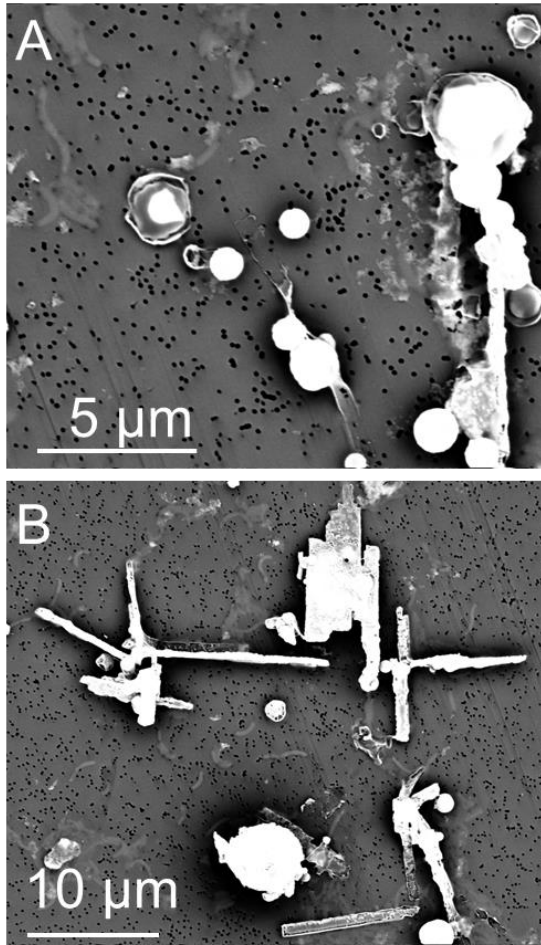

**Supplementary figure 1.** SEM images of particles formed in *S. kujiense* cultures with thiosulfate and sulfide after 4 days of growth. The images were acquired in the in backscattered electron mode (bright areas are sulfur-rich).

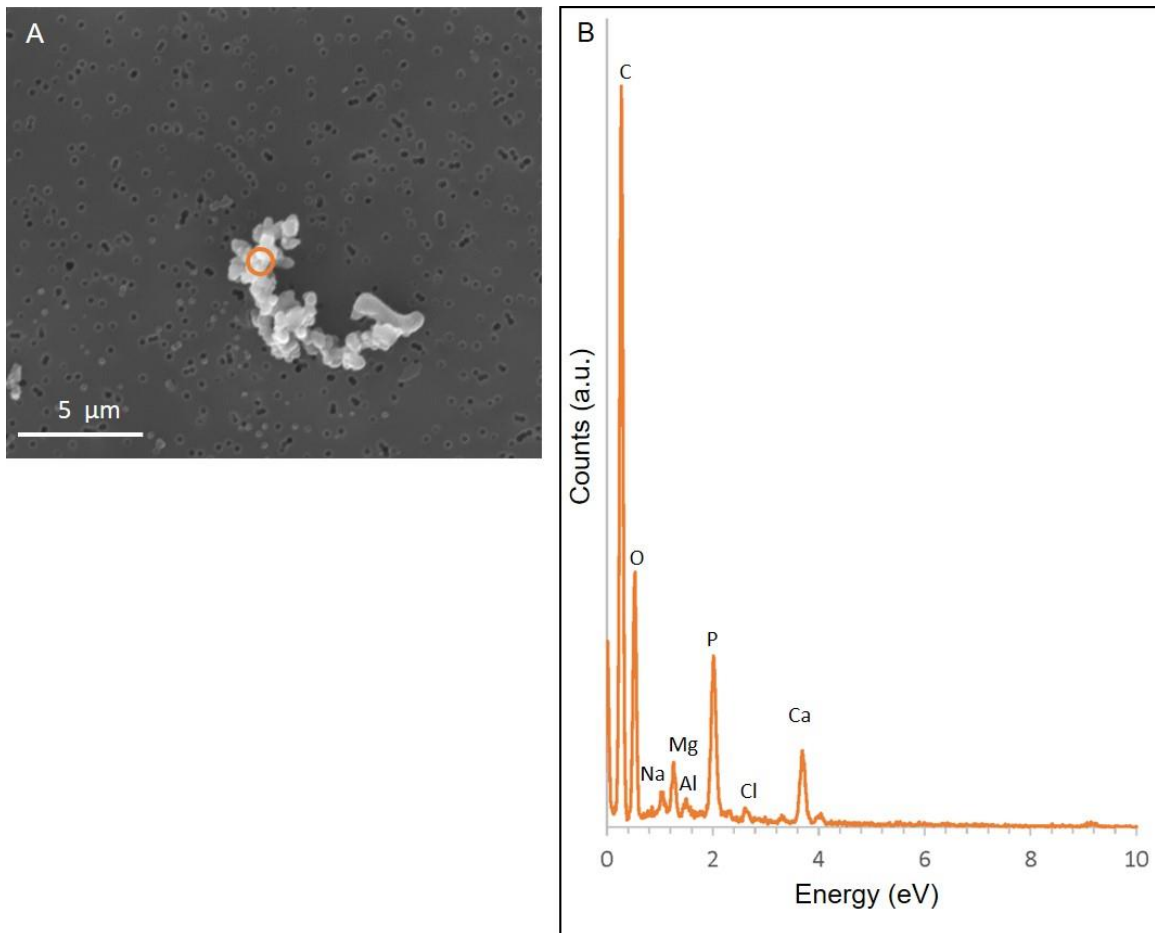

**Supplementary figure 2.** Phosphate particles found in *S. kujiense* cultures with thiosulfate only after 5 weeks of growth. **(A)** SEM micrograph. **(B)** XEDS analysis collected on the area depicted by an orange circle in (A).

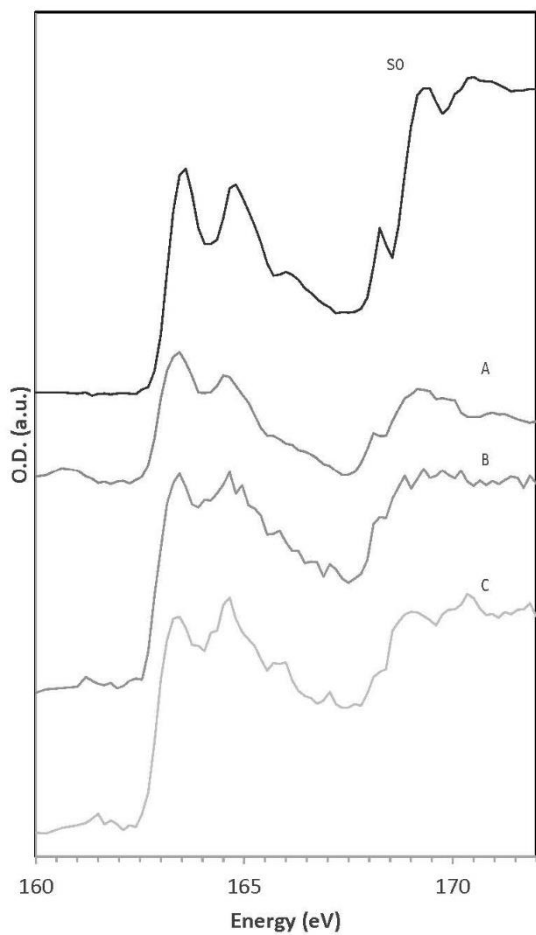

**Supplementary figure 3:** S L-edge STXM/XANES analyses obtained on the S(0) particles found in *S. kujiense* cultures with thiosulfate and sulfide and shown in Fig. 3. Spectrum A corresponds to the area in the dashed box in Fig. 3D, spectrum B to area in the dashed box in Fig. 3E, and spectrum C to the area in the dashed box in Fig. 3F. A reference elemental sulfur spectrum (S0) is also shown.

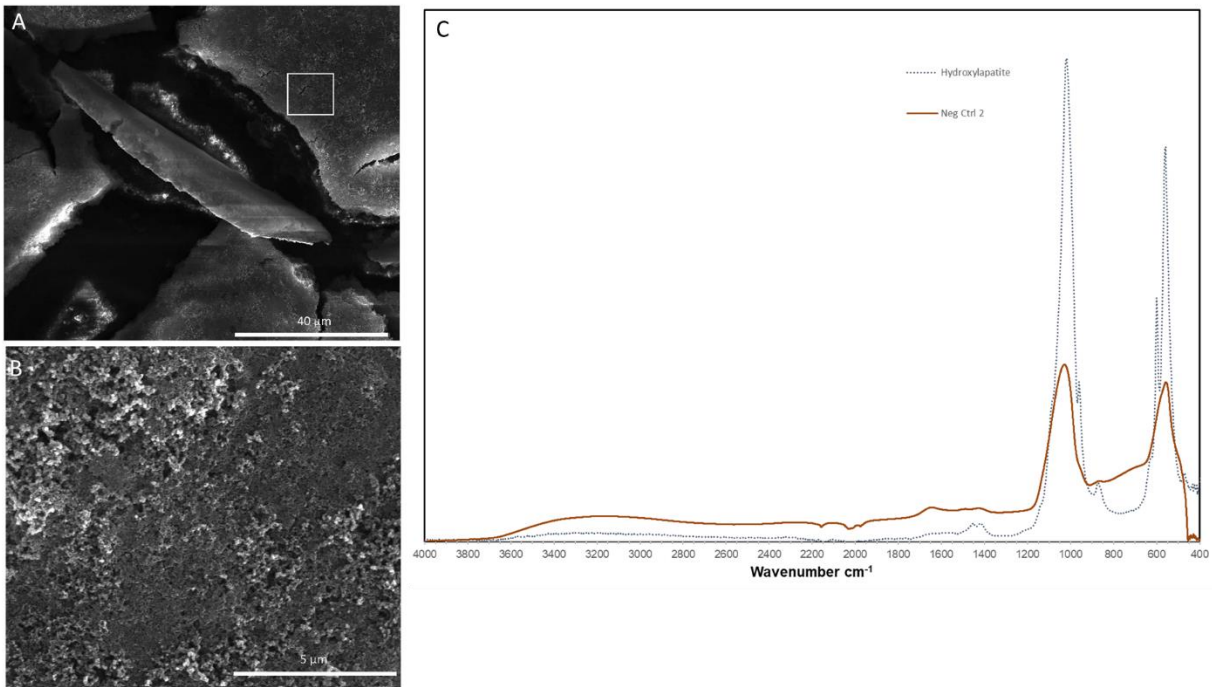

**Supplementary figure 4:** Phosphate particles precipitated in the abiotic control of the “spent medium” experiment. (A,B) SEM images. (B) is a close-up on the area depicted by a white box in (A). (C) FTIR spectrum collected on these particles (brown line), compared with a hydroxyapatite reference spectrum (broken grey line) (RRUFF database).

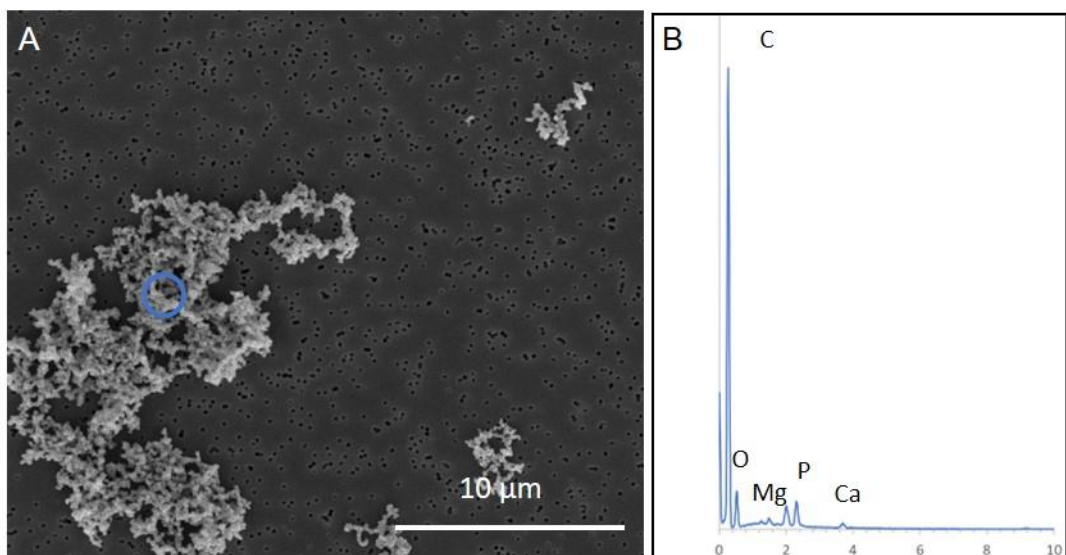

**Supplementary figure 5.** Phosphate particles found in the spent medium experiment prepared with *S. kujiense* cell cultures in the exponential phase. (A) SEM micrograph. (B) XEDS analysis collected on the area depicted by a blue circle in (A).

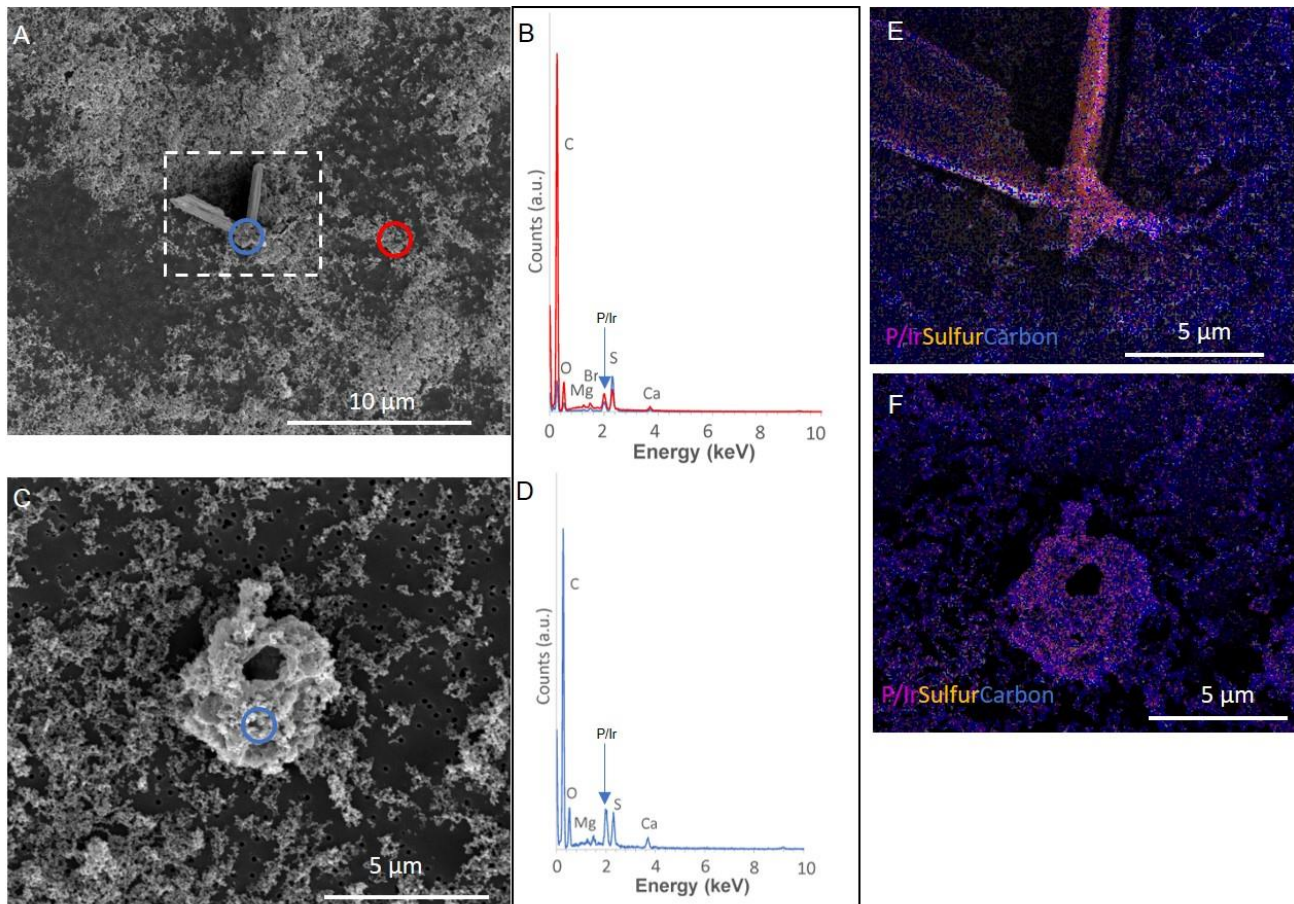

**Supplementary figure 6:** Phosphate and sulfur particles precipitated in the *E. coli* spent medium experiment after 1 month. (A,C) SEM images (B,D) XEDS spectra obtained on the areas depicted by circles in (A) and (C); (E) is an XEDS map of a subset of (A), the map shows the distribution of phosphorous, sulfur, and carbon. Note that the XEDS peak for Ir (coating) at ~2 keV interferes with that of P. (F) is an XEDS map showing the distribution of phosphorous, sulfur, and carbon in the area shown in (C).

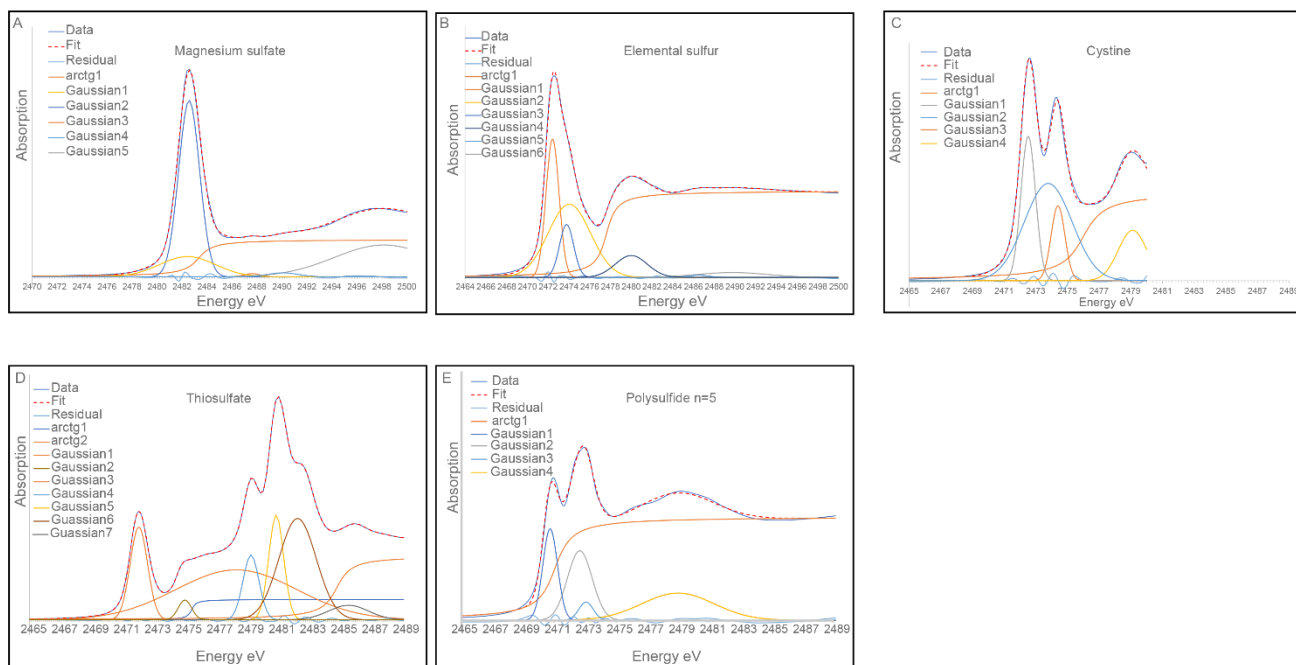

**Supplementary figure 7.** Gaussian curve fitting of S K-edge XANES spectra of the following standards: (A) magnesium sulfate; (B) elemental sulfur; (C) cystine; (D) sodium thiosulfate; (E) polysulfides ( $S_n^{2-}$ ,  $n=5$ ).

## 2 Supplementary Tables

**Supplementary Table 1.** Summary of conditions and sampling times for *S. kujiense* culture experiments. Sodium sulfide ( $\text{Na}_2\text{S}$ ) and thiosulfate ( $\text{Na}_2\text{S}_2\text{O}_3$ ) are indicated as the electron donors.

| Electron donor                                                       | Sampling time | Analyses       |
|----------------------------------------------------------------------|---------------|----------------|
| 2mM $\text{Na}_2\text{S}$ + 10 mM $\text{Na}_2\text{S}_2\text{O}_3$  | 4 days        | SEM            |
| 2 mM $\text{Na}_2\text{S}$ + 10 mM $\text{Na}_2\text{S}_2\text{O}_3$ | 2 weeks       | Raman, SEM     |
| 2 mM $\text{Na}_2\text{S}$ + 10 mM $\text{Na}_2\text{S}_2\text{O}_3$ | 5 weeks       | STXM           |
| 10 mM $\text{Na}_2\text{S}_2\text{O}_3$                              | 11 days       | SEM            |
| 10 mM $\text{Na}_2\text{S}_2\text{O}_3$                              | 4 days        | S K-edge XANES |

**Supplementary Table 2.** Summary of conditions and sampling times for *S. kujiense* spent medium experiments

| Growth phase of the initial culture | Sampling time | Analyses              |
|-------------------------------------|---------------|-----------------------|
| Exponential                         | 5 weeks       | SEM                   |
| Stationary                          | 5 weeks       | FT-IR                 |
| Stationary                          | 6 weeks       | Correlative Raman-SEM |
| Stationary                          | 6 months      | S K-edge XANES        |
| Abiotic control                     | 6 months      | SEM, S K-edge XANES   |



**Supplementary Table 3.** Gaussian curve fitting decomposition of the S K-edge XANES spectra from the spent medium experiments (Figure 6) and from the standards (Figure S7).

|                                                       | Energy  | Area | Width | $\chi^2$ | r-factor |
|-------------------------------------------------------|---------|------|-------|----------|----------|
| <i>Sulfuricurvum kujiense</i> spent medium experiment |         |      |       |          |          |
| Arctg1                                                | 2484    |      | 3.25  | 0.38     | 0.0015   |
| Gauss1                                                | 2481.3  | 4.24 |       |          |          |
| Gauss2                                                | 2482.75 | 2.87 |       |          |          |
| Gauss3                                                | 2487    | 0.36 |       |          |          |
| <i>Escherichia coli</i> spent medium experiment       |         |      |       |          |          |
| Arctg1                                                | 2474    |      | 0.72  | 0.40     | 0.0015   |
| Arctg2                                                | 2484    |      | 0.26  |          |          |
| Gauss1                                                | 2472.2  | 1.24 |       |          |          |
| Gauss2                                                | 2481.3  | 5.4  |       |          |          |
| Gauss3                                                | 2482.75 | 1.9  |       |          |          |
| DSMZ media 1020 with thiosulfate (blank)              |         |      |       |          |          |
| Arctg1                                                | 2474    |      | 0.07  | 0.19     | 0.0007   |
| Arctg2                                                | 2484    |      | 0.7   |          |          |
| Gauss1                                                | 2472    | 0.38 |       |          |          |
| Gauss2                                                | 2473.59 | 0.23 |       |          |          |
| Gauss3                                                | 2476.3  | 0.21 |       |          |          |
| Gauss4                                                | 2479.92 | 3.3  |       |          |          |
| Gauss5                                                | 2481.3  | 1.5  |       |          |          |
| Gauss6                                                | 2482.75 | 3.3  |       |          |          |
| Gauss7                                                | 2488.34 | 0.09 |       |          |          |
| <i>Sulfuricurvum kujiense</i> culture                 |         |      |       |          |          |
| Arctg1                                                | 2472.59 | 0.6  | 0.42  | 0.0014   |          |
| Arctg2                                                | 2484    | 2.23 |       |          |          |
| Gauss1                                                | 2472    | 1.37 |       |          |          |
| Gauss2                                                | 2479    | 1.1  |       |          |          |
| Gauss3                                                | 2480.9  | 0.7  |       |          |          |
| Gauss4                                                | 2482.4  | 2.44 |       |          |          |

|                                                               | Energy  | Height | Width | $\chi^2$ | r-factor |
|---------------------------------------------------------------|---------|--------|-------|----------|----------|
| <b>Elemental sulfur</b>                                       |         |        |       |          |          |
| Arctg1                                                        | 2477.64 | 1      | 0.74  | 0.06     | 0.00025  |
| Gauss1                                                        | 2472.45 | 2.54   | 0.63  |          |          |
| Gauss2                                                        | 2473.8  | 1.05   | 0.69  |          |          |
| Gauss3                                                        | 2474.07 | 4.34   | 2.05  |          |          |
| Gauss4                                                        | 2480.04 | 0.98   | 1.54  |          |          |
| Gauss5                                                        | 2486.54 | 0.06   | 1.01  |          |          |
| Gauss6                                                        | 2489.81 | 0.48   | 3.37  |          |          |
| <b>Thiosulfate (Na<sub>2</sub>S<sub>2</sub>O<sub>3</sub>)</b> |         |        |       |          |          |
| Arctg1                                                        | 2475.41 | 0.275  | 0.22  | 0.04     | 0.00018  |
| Arctg2                                                        | 2484.71 | 0.863  | 0.7   |          |          |
| Gauss1                                                        | 2472.01 | 1.75   | 0.56  |          |          |
| Gauss2                                                        | 2474.97 | 0.29   | 0.43  |          |          |
| Gauss3                                                        | 2478.27 | 6.54   | 3.9   |          |          |
| Gauss4                                                        | 2479.21 | 1.12   | 0.51  |          |          |
| Gauss5                                                        | 2480.82 | 1.68   | 0.48  |          |          |
| Gauss6                                                        | 2482.2  | 4.09   | 1.19  |          |          |
| Gauss7                                                        | 2485.46 | 0.63   | 0.28  |          |          |
| <b>Cystine</b>                                                |         |        |       |          |          |
| Arctg1                                                        | 2476    | 1      | 1     | 0.14     | 0.00068  |
| Gauss1                                                        | 2472.52 | 1.9    | 0.46  |          |          |
| Gauss2                                                        | 2473.78 | 4.16   | 1.51  |          |          |
| Gauss3                                                        | 2474.4  | 0.93   | 0.43  |          |          |
| Gauss4                                                        | 2479.11 | 1.30   | 0.9   |          |          |
| <b>Polysulfides (S<sub>n</sub><sup>2-</sup>, n = 5)</b>       |         |        |       |          |          |
| Arctg1                                                        | 2471    |        | 0.8   | 0.09     | 0.0004   |
| Gauss1                                                        | 2470.7  |        | 1.04  |          |          |
| Gauss2                                                        | 2472.6  |        | 1.33  |          |          |
| Gauss3                                                        | 2473    |        | 0.2   |          |          |
| Gauss4                                                        | 2478.9  |        | 1.51  |          |          |

---

|                              | Energy  | Height | Width | $\chi^2$ | r-factor |
|------------------------------|---------|--------|-------|----------|----------|
| <hr/>                        |         |        |       |          |          |
| Sulfate (MgSO <sub>4</sub> ) |         |        |       |          |          |
| <hr/>                        |         |        |       |          |          |
| Arctg1                       | 2483.32 | 1      | 0.87  | 0.12     | 0.00033  |
| Gauss1                       | 2482.44 | 3.03   | 2.23  |          |          |
| Gauss2                       | 2482.57 | 9.96   | 0.84  |          |          |
| Gauss3                       | 2487.6  | 0.14   | 0.64  |          |          |
| Gauss4                       | 2490.08 | 0.33   | 1.22  |          |          |
| Gauss5                       | 2498.15 | 8.51   | 3.97  |          |          |
